# Supplementary material for: Prostate Cancer Risk by BRCA2 Genomic Regions
Source: PubMed Central journal article supplement (PMC7532700; doi:10.1016/j.eururo.2020.05.005), 2020-10
Supplement: mmc1.pdf [file mmc1.pdf]

**Supplementary Table S1 – List of *BRCA2* pathogenic variants carried by the 447 study participants**

| Genomic level          | Protein level | <i>n</i>       |
|------------------------|---------------|----------------|
| c.-227-?_67+?del       | p.0           | 6              |
| c.-227-?_6841+?del     | p.0           | 1              |
| c.17_18del             | p.Lys6fs      | 1              |
| c.22_23del             | p.Arg8fs      | 2              |
| c.26del                | p.Pro9fs      | 5              |
| c.36dup                | p.Glu13*      | 1              |
| c.104_110del           | p.Leu35fs     | 2              |
| c.314T>G               | p.Leu105*     | 1              |
| c.396T>A               | p.Cys132*     | 1              |
| c.407del               | p.Asn136fs    | 2              |
| c.470_474del           | p.Lys157fs    | 1              |
| c.516+1G>T             | S             | 1              |
| c.517-2A>G             | S             | 2              |
| c.538_539dup           | p.Ser181fs    | 2              |
| c.574_575del           | p.Met192fs    | 3              |
| c.631+1G>A             | S             | 1              |
| c.631+2T>G             | p.Gly173fs    | 5              |
| c.658_659del           | p.Val220fs    | 4 <sup>a</sup> |
| c.755_758del           | p.Asp252fs    | 19             |
| c.765_770delinsAAACAAT | p.Asn255fs    | 1              |
| c.1097T>G              | p.Leu366*     | 1              |
| c.1189_1190insTTAG     | p.Gln397fs    | 7              |
| c.1231del              | p.Ile411fs    | 1              |
| c.1310_1313del         | p.Lys437fs    | 3              |
| c.1654del              | p.Ser552fs    | 1              |
| c.1689G>A              | p.Trp563*     | 3              |
| c.1787_1799del         | p.Asp596fs    | 2              |
| c.1813del              | p.Ile605fs    | 3              |
| c.1813dup              | p.Ile605fs    | 4              |
| c.1889del              | p.Thr630fs    | 1              |
| c.1929del              | p.Arg645fs    | 7              |
| c.2409T>G              | p.Tyr803*     | 3              |
| c.2606C>G              | p.Ser869*     | 1              |
| c.2701del              | p.Ala902fs    | 1              |
| c.2760del              | p.Ile921fs    | 1              |
| c.2808_2811del         | p.Ala938fs    | 10             |
| c.2870del              | p.Asn957fs    | 1              |
| c.3009_3010del         | p.His1003fs   | 1              |
| c.3158T>G              | p.Leu1053*    | 2              |
| c.3195_3198del         | p.Asn1066fs   | 2              |
| c.3405C>A              | p.Tyr1135*    | 1              |
| c.3530_3533del         | p.Asp1177fs   | 1              |

|                    |             |    |
|--------------------|-------------|----|
| c.3545_3546del     | p.Phe1182*  | 2  |
| c.3599_3600del     | p.Cys1200*  | 1  |
| c.3680_3681del     | p.Leu1227fs | 1  |
| c.3785C>G          | p.Ser1262*  | 4  |
| c.3847_3848del     | p.Val1283fs | 4  |
| c.3860del          | p.Asn1287fs | 1  |
| c.4037_4038del     | p.Thr1346fs | 1  |
| c.4101del          | p.Lys1367fs | 1  |
| c.4137_4141del     | p.Ile1380fs | 1  |
| c.4163_4164delinsA | p.Thr1388fs | 5  |
| c.4169del          | p.Leu1390fs | 1  |
| c.4223del          | p.Gln1408fs | 1  |
| c.4405_4409del     | p.Asp1469fs | 1  |
| c.4415_4418del     | p.Lys1472fs | 1  |
| c.4478_4481del     | p.Glu1493fs | 10 |
| c.4525C>T          | p.Gln1509*  | 1  |
| c.4631dup          | p.Asn1544fs | 1  |
| c.4638del          | p.Phe1546fs | 1  |
| c.4648G>T          | p.Glu1550*  | 1  |
| c.4712_4713del     | p.Glu1571fs | 2  |
| c.4828dup          | p.Val1610fs | 1  |
| c.4876_4877del     | p.Asn1626fs | 4  |
| c.4889C>G          | p.Ser1630*  | 2  |
| c.4914dup          | p.Val1639fs | 1  |
| c.4936_4939del     | p.Glu1646fs | 1  |
| c.4981del          | p.Tyr1661fs | 1  |
| c.5073dup          | p.Trp1692fs | 4  |
| c.5116_5119del     | p.Asn1706fs | 3  |
| c.5141_5144del     | p.Tyr1714fs | 1  |
| c.5217_5223del     | p.Tyr1739*  | 1  |
| c.5217T>A          | p.Tyr1739*  | 1  |
| c.5279C>G          | p.Ser1760*  | 2  |
| c.5298del          | p.Asn1766fs | 1  |
| c.5303_5304del     | p.Leu1768fs | 2  |
| c.5329_5334delinsG | p.Lys1777fs | 1  |
| c.5350_5351del     | p.Asn1784fs | 2  |
| c.5410_5411del     | p.Val1804fs | 1  |
| c.5576_5579del     | p.Ile1859fs | 4  |
| c.5641_5644del     | p.Lys1881fs | 1  |
| c.5655C>A          | p.Cys1885*  | 1  |
| c.5682C>G          | p.Tyr1894*  | 10 |
| c.5722_5723del     | p.Leu1908fs | 2  |
| c.5835dup          | p.Ser1946fs | 1  |
| c.5857G>T          | p.Glu1953*  | 1  |
| c.5909C>A          | p.Ser1970*  | 6  |
| c.5946del          | p.Ser1982fs | 42 |

|                       |              |                 |
|-----------------------|--------------|-----------------|
| c.6049A>T             | p.Lys2017*   | 1               |
| c.6052_6053del        | p.Ser2018*   | 1               |
| c.6065C>G             | p.Ser2022*   | 1               |
| c.6079dup             | p.Arg2027fs  | 1               |
| c.6081dup             | p.Glu2028fs  | 1               |
| c.6275_6276del        | p.Leu2092fs  | 27 <sup>a</sup> |
| c.6385G>T             | p.Glu2129*   | 1               |
| c.6405_6409del        | p.Asn2135fs  | 1               |
| c.6486_6489del        | p.Lys2162fs  | 1               |
| c.6588_6589del        | p.Lys2196fs  | 1               |
| c.6591_6592del        | p.Glu2198fs  | 5               |
| c.6602del             | p.Ser2201fs  | 1               |
| c.6658_6662del        | p.Glu2220fs  | 1               |
| c.6757_6758del        | p.Leu2253fs  | 2               |
| c.6829_6833del        | p.Ile2278fs  | 1               |
| c.6944_6947del        | p.Ile2315fs  | 4               |
| c.6980del             | p.Leu2327*   | 3               |
| c.6996_7004delins(20) | p.Cys2332fs  | 3               |
| c.7008-?_7805+?del    | DL           | 13              |
| c.7008-?_8331+?del    | DL           | 1               |
| c.7069_7070del        | p.Leu2357fs  | 5               |
| c.7342_7343del        | p.Lys2448fs  | 1               |
| c.7480C>T             | p.Arg2494*   | 4               |
| c.7495C>T             | p.Gln2499*   | 1               |
| c.7543dup             | p.Thr2515fs  | 1               |
| c.7558C>T             | p.Arg2520*   | 1               |
| c.7757G>A             | p.Trp2586*   | 6               |
| c.7758G>A             | p.Trp2586*   | 2               |
| c.7762_7764delinsTT   | p.Ile2588fs  | 4               |
| c.7795G>T             | p.Glu2599*   | 1               |
| c.7884dup             | p.Trp2629fs  | 3               |
| c.7934del             | p.Arg2645fs  | 1               |
| c.7958T>C             | p.Leu2653Pro | 1               |
| c.7977-1G>C           | S            | 4               |
| c.7977-2_-3del        | S            | 1               |
| c.7988A>T             | p.Glu2663Val | 2               |
| c.8113dup             | p.Ser2705fs  | 1               |
| c.8167G>C             | p.Asp2723His | 6               |
| c.8247_8248del        | p.Lys2750fs  | 2               |
| c.8297del             | p.Thr2766fs  | 9               |
| c.8395del             | p.Arg2799fs  | 1               |
| c.8575del             | p.Gln2859fs  | 9               |
| c.8633-?_8754+?del    | DL           | 1               |
| c.8633-?_9256+?del    | DL           | 2               |
| c.8756del             | p.Gly2919fs  | 3               |
| c.8878C>T             | p.Gln2960*   | 1               |

|                |             |   |
|----------------|-------------|---|
| c.8904del      | p.Val2969fs | 9 |
| c.8945_8946del | p.Lys2982fs | 1 |
| c.8951C>G      | p.Ser2984*  | 3 |
| c.8956dup      | p.Ile2986fs | 1 |
| c.9054_9055del | p.Ser3018fs | 4 |
| c.9069_9076del | p.Asn3024fs | 2 |
| c.9097dup      | p.Thr3033fs | 2 |
| c.9117+1G>A    | S           | 1 |
| c.9117G>A      | p.Val2985fs | 2 |
| c.9157del      | p.Glu3053fs | 2 |
| c.9253dup      | p.Thr3085fs | 2 |
| c.9257-2A>G    | S           | 1 |
| c.9294C>G      | p.Tyr3098*  | 6 |
| c.9357_9360del | p.Ile3120fs | 2 |
| c.9380G>A      | p.Trp3127*  | 1 |
| c.9382C>T      | p.Arg3128*  | 7 |
| c.9481A>T      | p.Lys3161*  | 1 |
| c.9490_9491del | p.Asn3164fs | 1 |
| c.9502-2A>C    | S           | 1 |

DL = large deletion; S = splice site.

The pathogenic variants are specified using HGVS nomenclature (<http://varnomen.hgvs.org/>), using cDNA reference sequence NM\_000059.3 and reference genome hg18.

<sup>a</sup> One participant carried both c.658\_659del and c.6275\_6276del.

**Supplementary Table S2 – Prostate cancer risk by location of *BRCA2* pathogenic variant: adjustments and sensitivity analyses**

| PV location                       | HR<br>(95% CI)      | HR adjusted for<br>family history <sup>a</sup><br>(95% CI) | HR adjusted for<br>geographical<br>location <sup>b</sup><br>(95% CI) | HR omitting the<br>first 6 mo of<br>follow-up<br>(95% CI) | HR omitting<br>related<br>participants <sup>c</sup><br>(95% CI) | HR omitting<br>carriers of PVs<br>in c.756 to<br>c.1000 <sup>d</sup><br>(95% CI) | HR omitting<br>missense<br>variant carriers<br><sup>e</sup><br>(95% CI) | HR omitting<br>Ashkenazi<br>founder PV<br>carriers <sup>f</sup><br>(95% CI) |
|-----------------------------------|---------------------|------------------------------------------------------------|----------------------------------------------------------------------|-----------------------------------------------------------|-----------------------------------------------------------------|----------------------------------------------------------------------------------|-------------------------------------------------------------------------|-----------------------------------------------------------------------------|
| <i>Compared with non-PCCR PVs</i> |                     |                                                            |                                                                      |                                                           |                                                                 |                                                                                  |                                                                         |                                                                             |
| Non-PCCR (5' to c.7913)           | Reference           | Reference                                                  | Reference                                                            | Reference                                                 | Reference                                                       | Reference                                                                        | Reference                                                               | Reference                                                                   |
| PCCR (c.7914 to 3')               | 2.34<br>(1.09–5.03) | 2.03<br>(0.89–4.61)                                        | 2.50<br>(1.15–5.46)                                                  | 2.23<br>(0.93–5.37)                                       | 2.93<br>(1.23–6.97)                                             | 2.33<br>(1.09–5.01)                                                              | 2.56<br>(1.17–5.59)                                                     | 2.05<br>(0.94–4.48)                                                         |
| <i>Compared with OCCR PVs</i>     |                     |                                                            |                                                                      |                                                           |                                                                 |                                                                                  |                                                                         |                                                                             |
| 5' to c.2830                      | 1.72<br>(0.50–5.94) | 1.77<br>(0.53–5.98)                                        | 1.86<br>(0.47–7.36)                                                  | 2.55<br>(0.63–10.3)                                       | 1.60<br>(0.34–7.49)                                             | 1.75<br>(0.51–6.03)                                                              | 1.77<br>(0.51–6.17)                                                     | 1.49<br>(0.40–5.62)                                                         |
| OCCR (c.2831 to c.6401)           | Reference           | Reference                                                  | Reference                                                            | Reference                                                 | Reference                                                       | Reference                                                                        | Reference                                                               | Reference                                                                   |
| c.6402 to c.7913                  | 3.23<br>(0.79–13.2) | 2.86<br>(0.65–12.7)                                        | 4.18<br>(0.96–18.2)                                                  | 4.03<br>(0.75–21.7)                                       | 3.65<br>(0.67–19.7)                                             | 3.24<br>(0.80–13.2)                                                              | 3.21<br>(0.79–13.0)                                                     | 2.77<br>(0.61–12.5)                                                         |
| PCCR (c.7914 to 3')               | 3.41<br>(1.27–9.16) | 3.00<br>(1.06–8.54)                                        | 3.79<br>(1.41–10.2)                                                  | 3.96<br>(1.18–13.3)                                       | 4.29<br>(1.30–14.2)                                             | 3.42<br>(1.27–9.18)                                                              | 3.76<br>(1.36–10.4)                                                     | 2.89<br>(0.98–8.53)                                                         |
| Indeterminable                    |                     |                                                            |                                                                      |                                                           |                                                                 |                                                                                  |                                                                         |                                                                             |

CI = confidence interval; HR = hazard ratio; OCCR = ovarian cancer cluster region; PCCR = prostate cancer cluster region; PV = pathogenic variant.

<sup>a</sup> Number of first- and second-degree relatives diagnosed with prostate cancer.

<sup>b</sup> Location of recruiting clinic: London; South or East England; Wales, English Midlands or North England; Scotland or Ireland.

<sup>c</sup> Participants for which at least one male relative was included in the study ( $n = 94$  omitted).

<sup>d</sup> Carriers of PVs in the *BRCA2* region c.756 to c.1000 suggested to be associated with increased prostate cancer risks by Patel et al [1] ( $n = 1$  omitted).

<sup>e</sup> Carriers of pathogenic missense variants ( $n = 9$  omitted).

<sup>f</sup> Carriers of c.5946delT ( $n = 42$  omitted).

## References

- [1] Patel VL, Busch EL, Friebel TM, et al. Association of genomic domains in BRCA1 and BRCA2 with prostate cancer risk and aggressiveness. *Cancer Res* 2020;80:624–638.
